# Supplementary material for: The elemental fingerprint as a potential tool for tracking the fate of real-life model nanoplastics generated from plastic consumer products in environmental systems
Source: Royal Society of Chemistry journal article supplement (doi:10.1039/d3en00559c), 2023-12-14
Supplement: d3en00559c1.pdf [file d3en00559c1.pdf]

**Supporting Information for**

**Elemental fingerprint as a potential tool for tracking the fate of real-life model nanoplastics  
generated from plastic consumer products in environmental systems**

Mohammed Baalousha<sup>1\*</sup>, Jingjing Wang<sup>1</sup>, Md Mahmudun Nabi<sup>1</sup>, Mahbub Alam<sup>1</sup>, Mahdi Erfani<sup>2</sup>,

Julien Gigault<sup>3</sup>, Florent Blancho<sup>4</sup>, Mélanie Davranche<sup>4</sup>, Phillip Potter<sup>5</sup>, Souhail R. Al-Abed<sup>5</sup>

**Affiliations:**

<sup>1</sup> Center for Environmental Nanoscience and Risk, Department of Environmental Health Sciences, Arnold School of Public Health, University of South Carolina, SC 29208, United States

<sup>2</sup> TAKUVIK Laboratory, CNRS/Université Laval, 1045, av. de La Médecine, Québec G1V 0A6, Canada

<sup>3</sup> Géosciences Rennes, CNRS/Université de Rennes, 263 av. Général Leclerc, 35000 Rennes, France

<sup>4</sup> Office of Research and Development, Center for Environmental Solutions and Emergency Response, US Environmental Protection Agency, 26 W. Martin Luther King Drive, Cincinnati, OH 45268, United States

\* Corresponding author: [mbaalous@mailbox.sc.edu](mailto:mbaalous@mailbox.sc.edu)

## 1. Elemental analysis by SP-ICP-TOF-MS

**Table S1.** Operating conditions for inductively coupled plasma-time of flight-mass spectrometer analysis (TOFWERK icpTOF R) for conventional (dissolved metal concentration) and single particle analysis modes.

| <b>Instrument parameter</b> | <b>Total concentration analysis</b>  |     |     |      |     | <b>Single particle analysis</b>      |     |     |      |     |
|-----------------------------|--------------------------------------|-----|-----|------|-----|--------------------------------------|-----|-----|------|-----|
| Plasma Power                | 1550 W                               |     |     |      |     | 1550 W                               |     |     |      |     |
| Nebulizer Gas Flow          | 1.10-1.14 L/min                      |     |     |      |     | 1.10-1.14 L/min                      |     |     |      |     |
| Auxiliary Gas Flow          | 0.8 L/min                            |     |     |      |     | 0.8 L/min                            |     |     |      |     |
| Cooling Gas Flow            | 14 L/min                             |     |     |      |     | 14 L/min                             |     |     |      |     |
| Injector Diameter           | 2.5 mm                               |     |     |      |     | 2.5 mm                               |     |     |      |     |
| Collision Cell Gas          | 5 mL/min He with 4.5% H <sub>2</sub> |     |     |      |     | 5 mL/min He with 4.5% H <sub>2</sub> |     |     |      |     |
| CCT Bias                    | -2.00 to -4.00 V                     |     |     |      |     | -2.00 to -4.00 V                     |     |     |      |     |
| Notch                       | Mass                                 | 29  | 32  | 36.3 | 41  | Mass                                 | 29  | 32  | 36.3 | 41  |
|                             | Amplitude (V)                        | 1.6 | 2.0 | 2.0  | 1.2 | Amplitude (V)                        | 1.6 | 2.0 | 2.0  | 1.2 |
| TOF Repetition Rate         | 33 kHz                               |     |     |      |     | 33 kHz                               |     |     |      |     |
| Detected Mass Range         | 14-275 m/Z                           |     |     |      |     | 14-275 m/Z                           |     |     |      |     |
| (CeO/Ce)                    | < 4.0%                               |     |     |      |     | < 4.0%                               |     |     |      |     |
| Data Acquisition            | Continuous Mode                      |     |     |      |     | Continuous Mode                      |     |     |      |     |
| TOF Time Resolution         | 0.3 s                                |     |     |      |     | 30 μs                                |     |     |      |     |
| Integration Time            | 0.3 s                                |     |     |      |     | 2 ms                                 |     |     |      |     |
| Acquisition Time            | 60 s                                 |     |     |      |     | 200-300 s                            |     |     |      |     |
| Sample Flow Rate            | -                                    |     |     |      |     | 0.455 mL/min                         |     |     |      |     |
| Transport Efficiency        | -                                    |     |     |      |     | 6.6% (5-7%)                          |     |     |      |     |

**Table S2.** Elements monitored for single particle-inductively coupled plasma-time of flight-mass spectrometer analysis and the corresponding particle mass and size detection limits.

| Element | Isotope           | Mass detection limit (g) | Size detection limit (nm) | Size detection limit (nm) | Metal oxide formulae            |
|---------|-------------------|--------------------------|---------------------------|---------------------------|---------------------------------|
| Al      | <sup>27</sup> Al  | $8.30 \times 10^{-15}$   | 180                       | 196                       | Al <sub>2</sub> O <sub>3</sub>  |
| Si      | <sup>28</sup> Si  | $2.95 \times 10^{-14}$   | 289                       | 357                       | SiO <sub>2</sub>                |
| Ti      | <sup>48</sup> Ti  | $5.57 \times 10^{-16}$   | 62                        | 75                        | TiO <sub>2</sub>                |
| V       | <sup>51</sup> V   | $3.77 \times 10^{-16}$   | 49                        | 73                        | V <sub>2</sub> O <sub>5</sub>   |
| Cr      | <sup>52</sup> Cr  | $3.35 \times 10^{-16}$   | 45                        | 56                        | Cr <sub>2</sub> O <sub>3</sub>  |
| Mn      | <sup>55</sup> Mn  | $2.58 \times 10^{-16}$   | 41                        | 54                        | MnO <sub>2</sub>                |
| Fe      | <sup>56</sup> Fe  | $3.27 \times 10^{-16}$   | 43                        | 55                        | Fe <sub>2</sub> O <sub>3</sub>  |
| Co      | <sup>59</sup> Co  | $2.08 \times 10^{-16}$   | 35                        | 45                        | Co <sub>3</sub> O <sub>4</sub>  |
| Ni      | <sup>60</sup> Ni  | $8.55 \times 10^{-16}$   | 57                        | 68                        | NiO                             |
| Cu      | <sup>65</sup> Cu  | $6.80 \times 10^{-16}$   | 53                        | 64                        | CuO                             |
| Zn      | <sup>66</sup> Zn  | $1.53 \times 10^{-15}$   | 74                        | 87                        | ZnO                             |
|         |                   |                          |                           |                           |                                 |
| Zr      | <sup>90</sup> Zr  | $1.57 \times 10^{-16}$   | 36                        | 41                        | ZrO <sub>2</sub>                |
| Nb      | <sup>93</sup> Nb  | $8.25 \times 10^{-17}$   | 26                        | 36                        | Nb <sub>2</sub> O <sub>5</sub>  |
| Sn      | <sup>120</sup> Sn | $1.43 \times 10^{-16}$   | 33                        | 37                        | SnO <sub>2</sub>                |
| Sb      | <sup>121</sup> Sb | $1.83 \times 10^{-16}$   | 37                        | 43                        | Sb <sub>2</sub> O <sub>3</sub>  |
| Ba      | <sup>138</sup> Ba | $6.85 \times 10^{-17}$   | 33                        | 29                        | BaO                             |
| La      | <sup>139</sup> La | $4.55 \times 10^{-17}$   | 24                        | 25                        | La <sub>2</sub> O <sub>3</sub>  |
| Ce      | <sup>140</sup> Ce | $4.89 \times 10^{-17}$   | 24                        | 25                        | CeO <sub>2</sub>                |
| Pr      | <sup>141</sup> Pr | $3.81 \times 10^{-17}$   | 22                        | 24                        | Pr <sub>6</sub> O <sub>11</sub> |
| Nd      | <sup>144</sup> Nd | $1.01 \times 10^{-16}$   | 30                        | 31                        | Nd <sub>2</sub> O <sub>3</sub>  |
| Sm      | <sup>152</sup> Sm | $1.17 \times 10^{-16}$   | 31                        | 31                        | Sm <sub>2</sub> O <sub>3</sub>  |
| Eu      | <sup>153</sup> Eu | $5.98 \times 10^{-17}$   | 28                        | 26                        | Eu <sub>2</sub> O <sub>3</sub>  |
| Gd      | <sup>158</sup> Gd | $1.32 \times 10^{-16}$   | 32                        | 34                        | Gd <sub>2</sub> O <sub>3</sub>  |
| Tb      | <sup>159</sup> Tb | $3.20 \times 10^{-17}$   | 20                        | 21                        | Tb <sub>4</sub> O <sub>7</sub>  |
| Dy      | <sup>164</sup> Dy | $9.74 \times 10^{-17}$   | 28                        | 30                        | Dy <sub>2</sub> O <sub>3</sub>  |
| Ho      | <sup>165</sup> Ho | $2.92 \times 10^{-17}$   | 18                        | 20                        | Ho <sub>2</sub> O <sub>3</sub>  |
| Er      | <sup>166</sup> Er | $8.80 \times 10^{-17}$   | 26                        | 28                        | Er <sub>2</sub> O <sub>3</sub>  |
| Tm      | <sup>169</sup> Tm | $2.95 \times 10^{-17}$   | 18                        | 20                        | Tm <sub>2</sub> O <sub>3</sub>  |
| Yb      | <sup>174</sup> Yb | $8.27 \times 10^{-17}$   | 29                        | 27                        | Yb <sub>2</sub> O <sub>3</sub>  |
| Lu      | <sup>175</sup> Lu | $2.67 \times 10^{-17}$   | 17                        | 18                        | Lu <sub>2</sub> O <sub>3</sub>  |
| Hf      | <sup>180</sup> Hf | $6.34 \times 10^{-17}$   | 21                        | 25                        | HfO <sub>2</sub>                |
| Ta      | <sup>181</sup> Ta | $2.66 \times 10^{-17}$   | 14                        | 20                        | Ta <sub>2</sub> O <sub>5</sub>  |
| W       | <sup>184</sup> W  | $9.11 \times 10^{-17}$   | 21                        | 27                        | WO <sub>2</sub>                 |
| Pb      | <sup>208</sup> Pb | $6.23 \times 10^{-17}$   | 22                        | 24                        | PbO                             |
| Th      | <sup>232</sup> Th | $2.93 \times 10^{-17}$   | 17                        | 19                        | ThO <sub>2</sub>                |
| U       | <sup>238</sup> U  | $2.85 \times 10^{-17}$   | 14                        | 18                        | UO <sub>2</sub>                 |

Particle mass detection limit is calculated according to the Poisson distribution =

$$Mass_{detection\ limit} = 3.29\sqrt{background\ signal} + 2.71$$

Size detection limit is calculated as the equivalent spherical diameter from the particle mass detection limit assuming pure metal and metal oxide phases

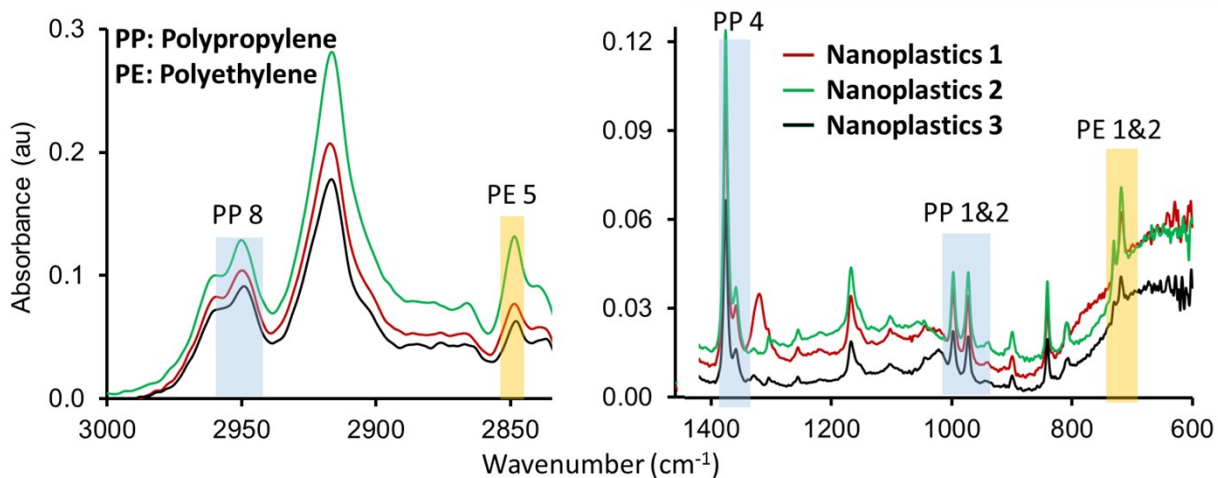

2.

3. **Figure S1.** Fourier transform-infrared (FT-IR) spectra of the model real life nanoplastics generated from ocean aged plastic fragments (NPO) collected from the North Atlantic garbage patch. For polyethylene, the specific bands PE 1&2 at  $675\text{ cm}^{-1}$  and PE 5 at  $2850\text{ cm}^{-1}$  correspond to the specific perpendicular deformation of the CH<sub>2</sub> and the symmetrical vibration of the C-H, respectively; PP1&2 at  $996$  and  $1166\text{ cm}^{-1}$  correspond to the rocking CH<sub>3</sub> while the PP 4 at  $1376\text{ cm}^{-1}$  is the symmetrical bending of the CH<sub>3</sub> and the PP8 is the asymmetrical stretching of the CH<sub>3</sub>.

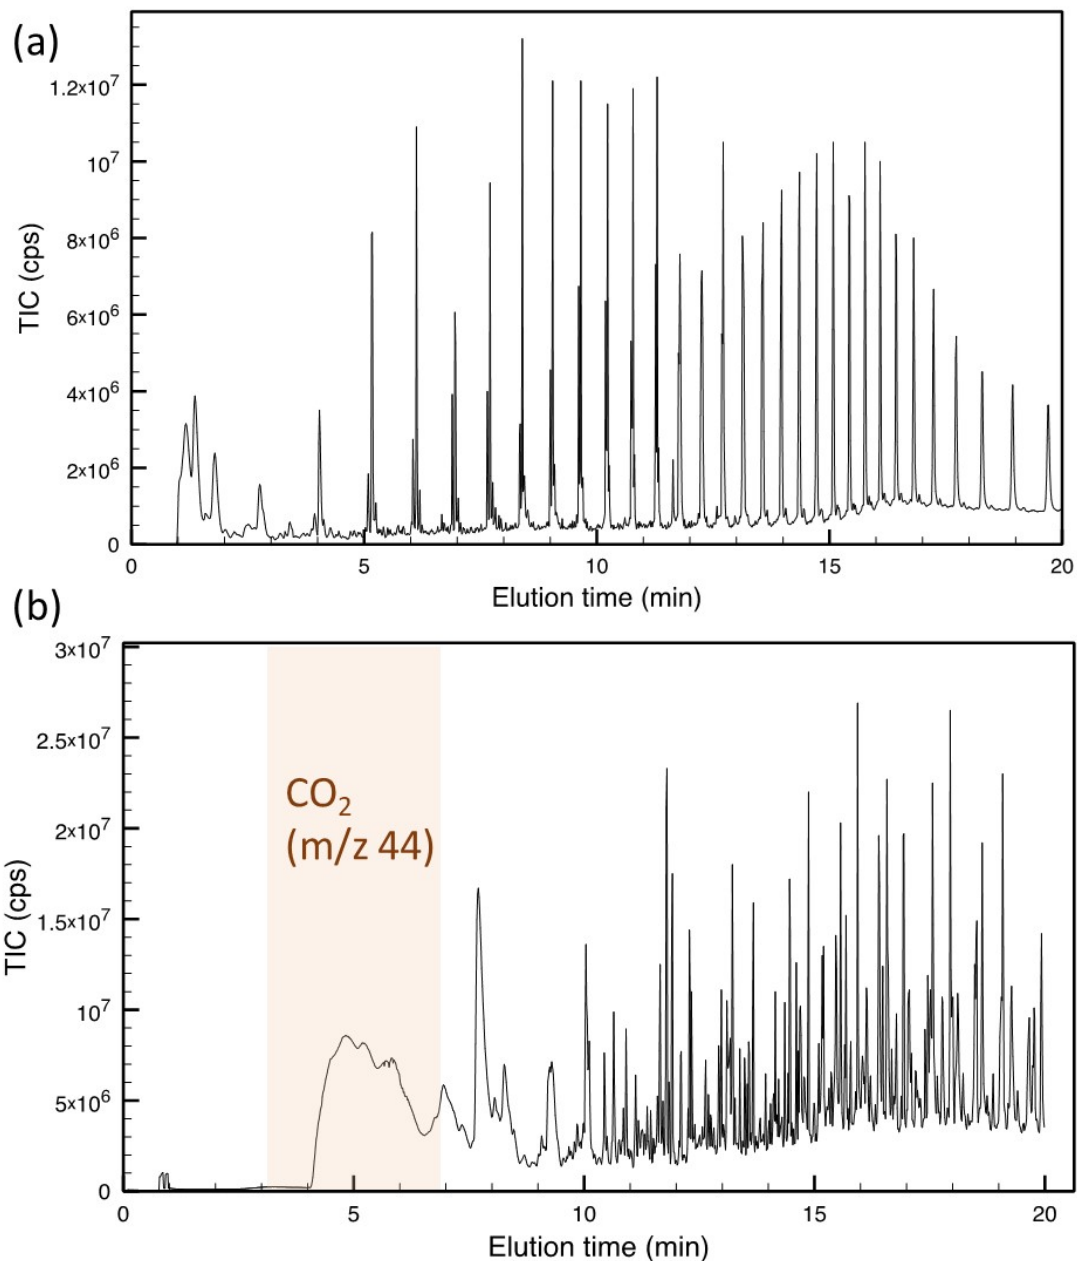

**Figure S2.** Total Ion Counts (TIC) pyrograms for (a) Nanoplastics 1 and (b) Nanoplastics 4, performed at 600 °C in the optimized conditions described in the material and methods section. For Nanoplastics 1, the alkene compounds are clearly identified without extracting the m/z as described in the main text. For Nanoplastics 4, the TIC pyrogram illustrates a large composition heterogeneity, including natural organic matter, propylene, and trace of polyethylene. It is worth noting that a large signal appears on the Nanoplastics 4 pyrogram and corresponds to the carbon dioxide. The formation of carbon dioxide is a strong indicator of the presence of natural organic matter in the pyrolysis cup, which confirms the largest heterogeneity in the colloidal composition for Nanoplastics 4. Spectra for Nanoplastics 2, and 3 are not presented as they are the same as those for Nanoplastics 1.

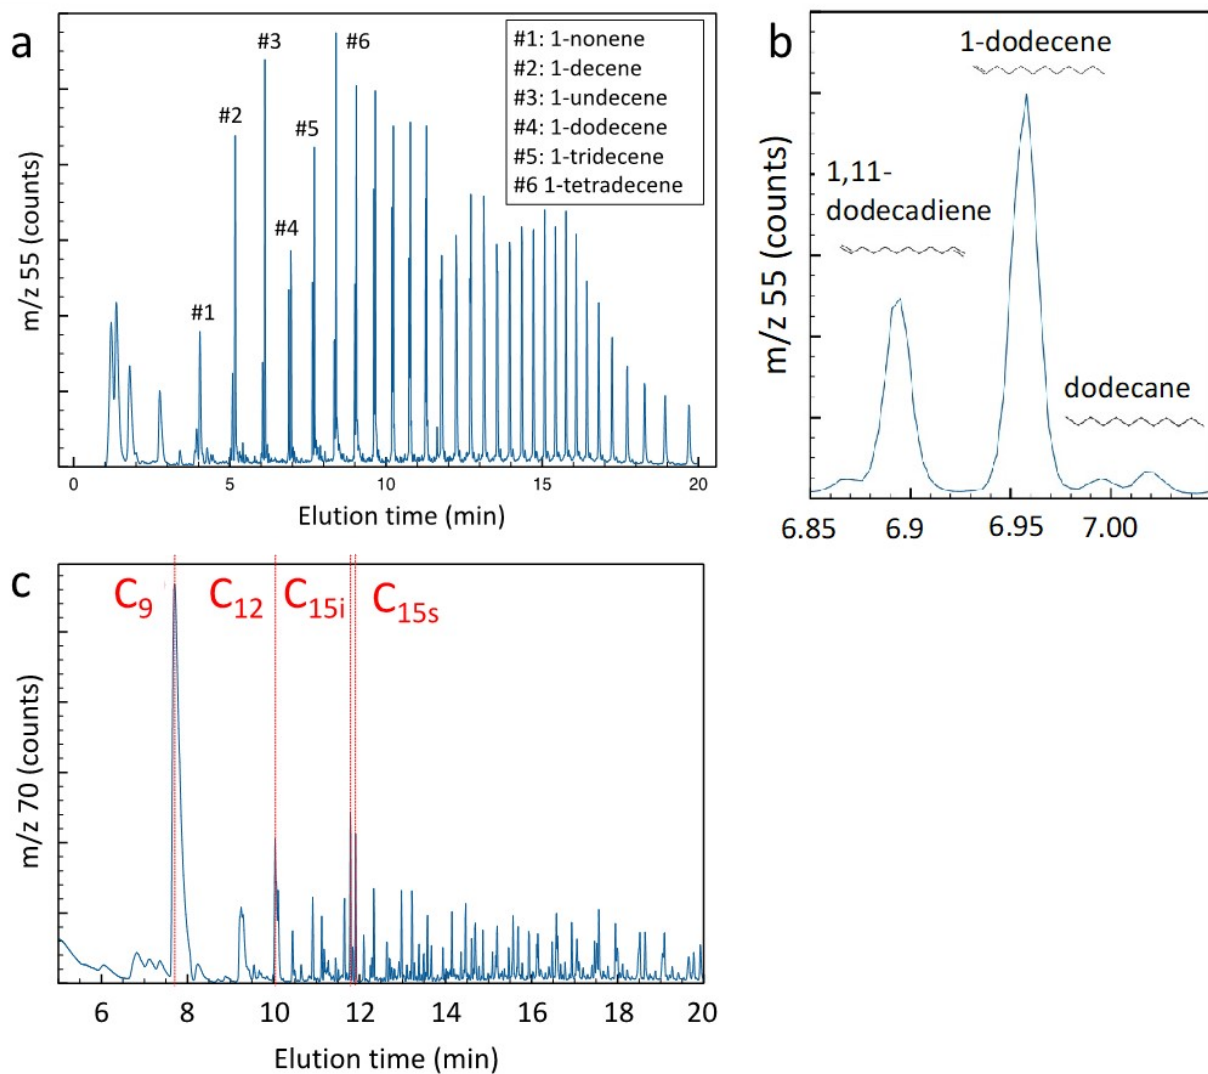

**Figure S3.** Pyrolysis GC-MS pyrograms of (a) m/z 55 for the Nanoplastics 1 obtained using a 30m DB5-MS C18 column, (b) zoom in on the dodecadiene/dodecane/dodecane peaks, and (c) m/z 70 of the Nanoplastics 4 with the markers of polypropylene (C<sub>9</sub>, C<sub>12</sub>, C<sub>15i</sub>, and C<sub>15s</sub>) obtained using a 60m DB5-MS C18 column. Similar results were obtained for Nanoplastics 1, 2 and 3 and are thus spectra for Nanoplastics 2 and Nanoplastics 3 are not presented here. The pyrogram illustrates the elution of pyrolysates (*i.e.*, fragments of macromolecules) formed during the pyrolysis at 600°C.

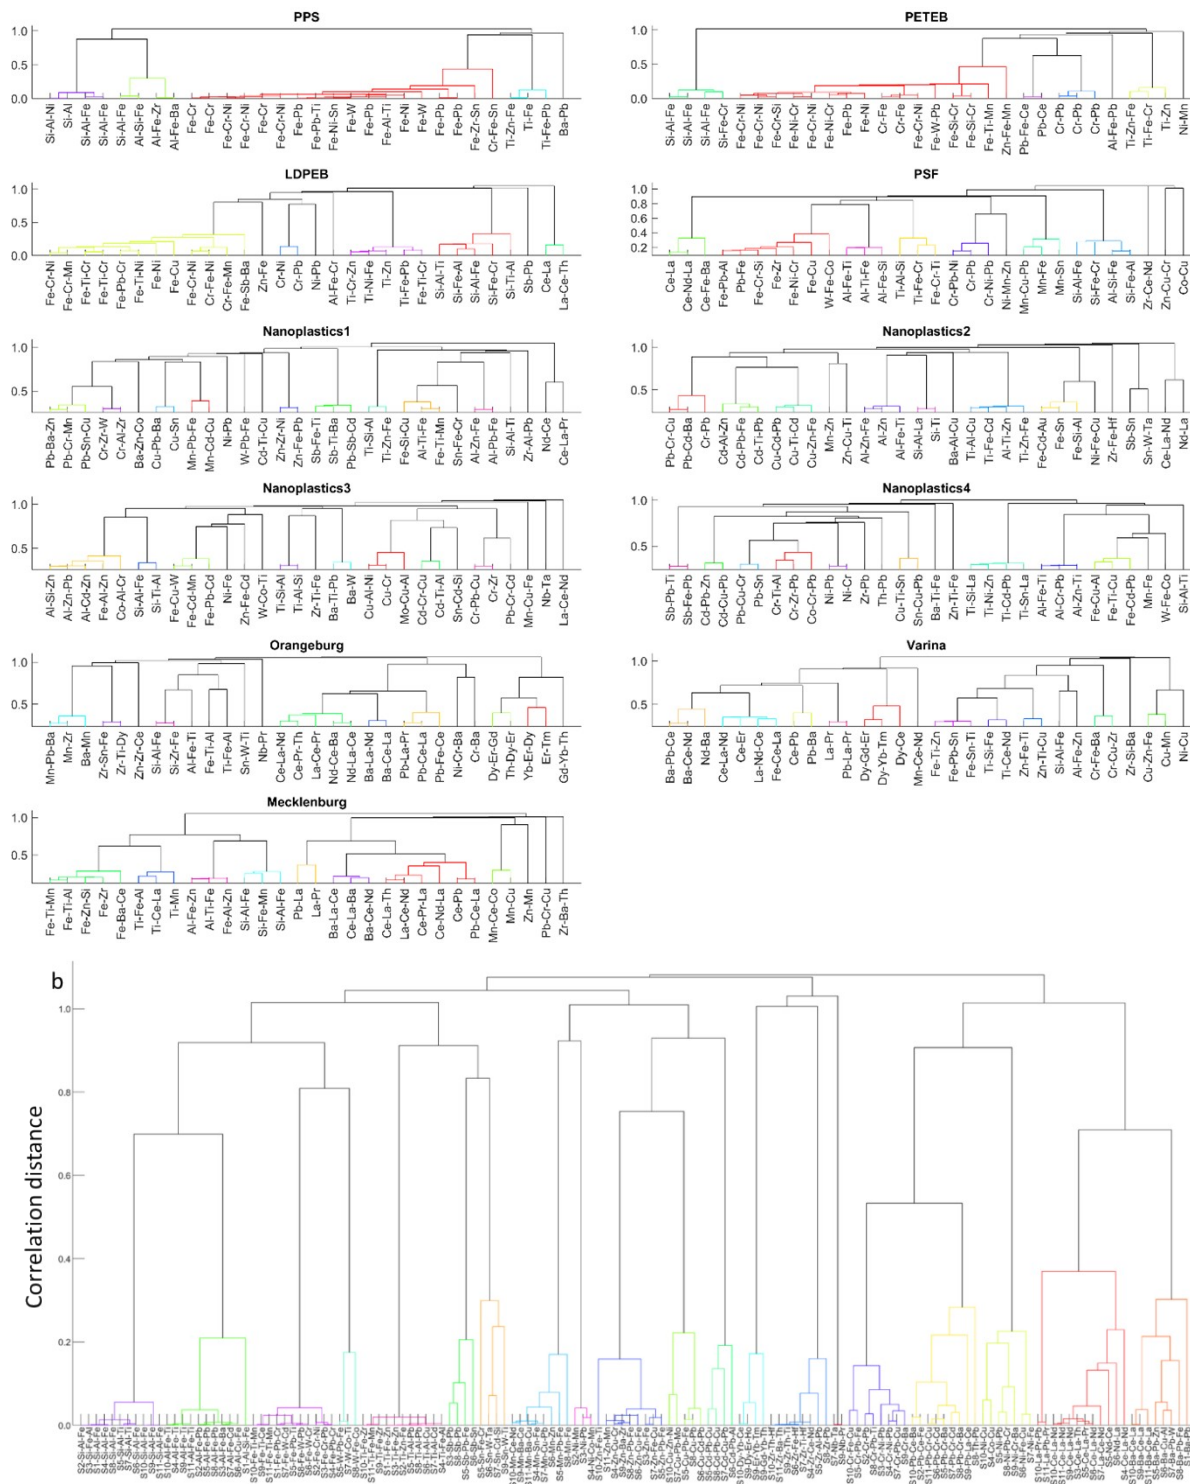

**Figure S4.** First stage clustering dendrogram. PPS (S1), PETEB (S2), LDPEB (S3), and PSF (S4) refer to the model real-life nanoplastics generated from new plastic products including polypropylene straw, polyethylene terephthalate bottle, white low density polyethylene bag, and polystyrene foam, respectively. Nanoplastics 1 (S5), 2 (S6), 3 (S7), and 4 (S8) refer to the model real-life nanoplastics generated from environmentally aged ocean plastic fragments. Orangeburg (S9), Varina (S10), and Mecklenburg (S11) refer to the three soil samples.

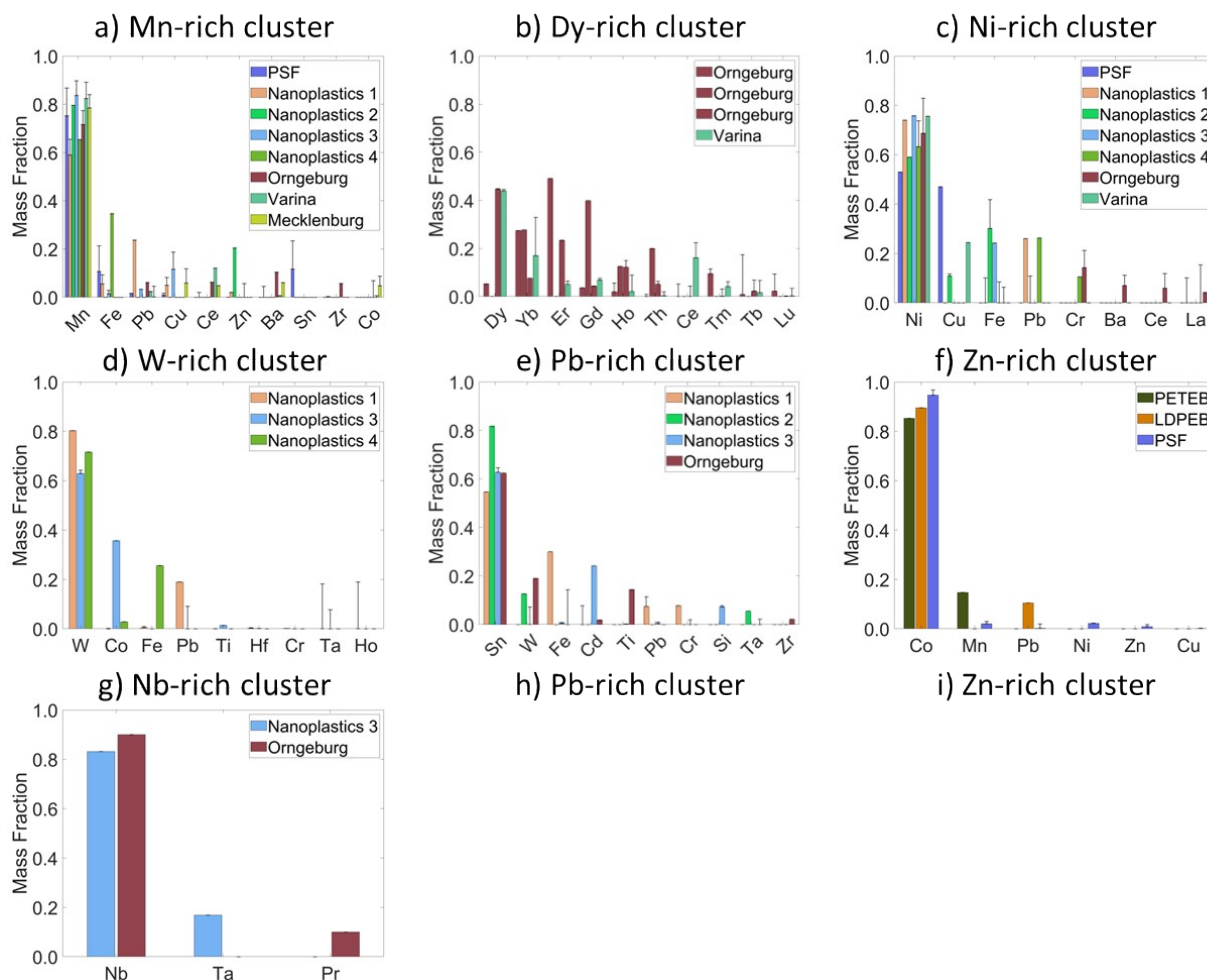

**Figure S5.** Mean mass fraction of frequent elements within each cluster. PPS, PETEB, LDBEB, and PSF refer to the model real-life nanoplastics generated from new plastic products including polypropylene straw, polyethylene terephthalate bottle, white low density polyethylene bag, and polystyrene foam, respectively. Nanoplastics 1, 2, 3, and 4 refer to the model real-life nanoplastics generated from environmentally aged ocean plastic fragments. Orangeburg, Varina, and Mecklenburg refer to the three soil samples.
